# Supplementary material for: Applicability of Thermal Dissipation Method in Sap Flow Measurement of Karst Shrub Community
Source: MDPI journal article supplement (doi:10.3390/f15020259), 2024-01-29
Supplement: s1 [file s1]

Supplementary Table S1 The material information of Figure 3

| Study                        | Species                                                                                                                         | a           | b      | Conduit diameter | Conduit density | Wood density | CV  |
|------------------------------|---------------------------------------------------------------------------------------------------------------------------------|-------------|--------|------------------|-----------------|--------------|-----|
| Alla et al. 2022             | <i>Phoenix dactylifera</i>                                                                                                      | 0.01345     | 1.603  |                  |                 | 0.77         |     |
| Bush et al. 2010             | <i>Elaeagnus angustifolia</i>                                                                                                   |             | 1.65   | 125.67           |                 | 0.48         |     |
| Bush et al. 2010             | <i>Gleditsia triacanthos</i>                                                                                                    |             | 1.4    | 178.11           |                 | 0.69         |     |
| Bush et al. 2010             | <i>Quercus gambelii</i>                                                                                                         |             | 1.88   | 30.93            |                 | 0.63         |     |
| Bush et al. 2010             | <i>Sophora japonica</i>                                                                                                         |             | 1.24   |                  |                 |              |     |
| Bush et al. 2010             | <i>Tilia cordata</i>                                                                                                            | 0.0119      | 1.231  | 22.10            |                 | 0.45         |     |
| Cabibel et al. 1991          | <i>Malus domestica</i> , <i>Quercus sp.</i> ,<br><i>Castanea sativa</i>                                                         | 0.02272     | 0.7694 | 117.11           | 181.18          | 0.58         |     |
| Fuchs et al. 2017            | <i>Fagus sylvatica</i> , <i>Tilia cordata</i> ,<br><i>Acer pseudoplatanus</i> ,<br><i>Acer campestre</i> , <i>Populus nigra</i> | 0.01597     | 1.329  | 37.51            | 400.63          | 0.55         |     |
| Fujime et al. 2021           | <i>Cryptomeria japonica</i>                                                                                                     | 0.00273     | 0.371  | 14.92            |                 | 0.36         |     |
| Granier 1985                 | <i>Pseudotsuga menziesii</i> ,<br><i>Pinus nigra</i> , <i>Quercus pedunculata</i>                                               | 0.0119      | 1.231  | 20.01            |                 | 0.54         |     |
| Gutiérrez and Santiago. 2006 | <i>Hyeronima alchorneoides</i>                                                                                                  | 0.012257    | 1.231  |                  |                 | 0.58         |     |
| Hadiwijaya et al. Forests    | <i>Abies balsamea</i>                                                                                                           | 0.015276944 | 1.204  | 22.05            |                 | 0.45         | -34 |
| Herbst et al. 2007           | <i>Crataegus monogina</i>                                                                                                       |             | 1.387  | 17.65            | 990.59          | 0.51         |     |
| Herbst et al. 2007           | <i>Acer campestre</i>                                                                                                           |             |        | 26.82            | 669.64          | 0.57         |     |
| Hu et al. 2022               | <i>Pinus bungeana</i>                                                                                                           | 0.0264      | 0.738  |                  |                 | 0.43         | -67 |
| Hu et al. 2022               | <i>Salix matsudana</i>                                                                                                          | 0.0722      | 1.113  |                  |                 |              | -60 |
| Hubbard et al. 2010          | <i>Eucalyptus grandis x urophylla</i>                                                                                           | 0.084555556 | 1.606  | 181.69           |                 |              |     |
| Hultine et al. 2010          | <i>Diorhabda carinulata</i> ,                                                                                                   | 0.024       | 1.16   | 134.52           |                 |              | -50 |

|                            |                                                                |             |        |        |         |      |        |
|----------------------------|----------------------------------------------------------------|-------------|--------|--------|---------|------|--------|
|                            | <i>Tamarix spp.</i>                                            |             |        |        |         |      |        |
| Iida et al. 2022           | <i>Cryptomeria japonica</i>                                    | 0.044010278 | 1.449  | 14.92  |         | 0.36 | -61.4  |
| Liu et al. 2022            | <i>Populus tomentosa</i>                                       | 0.0287      | 1.236  |        |         | 0.45 | -60.96 |
| Liu et al. 2022            | <i>Salix babylonica</i>                                        | 0.0145      | 0.852  |        |         | 0.46 | -63.37 |
| Lu 2002                    | <i>Mangifera indica</i>                                        | 0.01244383  |        |        | 5.00    | 0.56 |        |
| Lu 2002                    | <i>Garcinia mangostana</i>                                     | 0.0165172   |        |        |         | 0.81 |        |
| Ma et al. 2017             | <i>Robinia pseudoacacia</i>                                    | 0.051       | 1.118  | 149.36 | 9.33    | 0.72 |        |
| Niu et al., 2015           | <i>Elaeis guineensis</i>                                       | 0.0134      | 1.6    |        |         | 0.24 | 17.3   |
| Ouyang et al., 2018        | <i>Cunninghamia lanceolata</i>                                 | 0.0253      | 1.2259 | 15.43  |         | 0.32 | -54    |
| Pasqualotto et al., 2019   | <i>Corylus avellana</i>                                        | 0.0385      | 1.45   | 23.31  | 788.17  | 0.57 |        |
| Paudel et al. 2013         | <i>Malus domestica, Peltophorum<br/>dubium, Prunus persica</i> | 0.0135      | 1.157  | 57.17  | 77.00   | 0.66 |        |
| Peters et al. 2018         | <i>Larix decidua, Picea abies</i>                              | 0.007287778 |        | 11.80  |         | 0.54 | -37    |
| Renninger et al., 2010     | <i>Iriartea deltoidea</i>                                      | 0.01923     | 1.3    |        |         | 0.29 |        |
| Rubilar et al. 2017        | <i>Eucalyptus globulus</i>                                     | 0.038194444 | 1.245  | 115.00 | 10.67   | 0.74 |        |
| Schmidt-walter et al. 2014 | <i>Populus sp</i>                                              | 0.03521     | 1.552  | 52.92  | 45.00   | 0.39 |        |
| Sérvulo et al. 2017        | <i>Khaya ivorensis</i>                                         | 0.026825    | 1.231  | 136.67 | 13.00   | 0.46 |        |
| Shinohara et al. 2022      | <i>Cryptomeria japonica,<br/>Chamaecyparis obtusa</i>          | 0.01197     | 0.737  |        |         | 0.43 |        |
| Siddiq et al. 2019         | <i>Tectona grandis</i>                                         | 0.104129    | 1.127  | 285.00 | 7.67    | 0.60 |        |
| Song et al. 2022           | <i>Pinus sylvestris</i>                                        | 0.0151      | 1.128  | 14.00  | 3490.76 | 0.54 |        |
| Steppe et al. 2010         | <i>Fagus grandifolia</i>                                       | 0.023       | 0.9519 | 47.99  |         | 0.62 | -60    |
| Sun et al. 2012            | <i>Liquidambar styraciflua</i>                                 | 0.0124      | 1.151  | 34.20  | 338.38  | 0.55 | -23    |
| Sun et al. 2012            | <i>Populus deltoides</i>                                       | 0.0121      | 1.141  | 117.53 | 63.00   | 0.42 | -34    |
| Sun et al. 2012            | <i>Quercus alba</i>                                            | 0.0128      | 1.47   | 136.81 | 269.24  | 0.65 | -15    |

|                     |                               |          |        |        |        |      |          |
|---------------------|-------------------------------|----------|--------|--------|--------|------|----------|
| Sun et al. 2012     | <i>Ulmus americana</i>        | 0.0272   | 2.572  | 75.90  | 160.00 | 0.49 | -9       |
| Sun et al. 2012     | <i>Pinus echinata</i>         | 0.0101   | 1.303  | 12.46  |        | 0.51 | -14      |
| Sun et al. 2012     | <i>Pinus taeda</i>            | 0.0097   | 1.336  | 38.50  |        | 0.49 | 55       |
| Vellame et al. 2009 | <i>Mangifera indica</i>       | 0.017    | 1.231  | 111.17 | 5.00   | 0.56 |          |
| Xie et al. 2018     | <i>Robinia pseudoacacia</i>   | 0.112    | 1.68   | 215.00 | 7.00   | 0.72 |          |
| Xie et al. 2018     | <i>Platanus orientalis</i>    | 0.02     | 1.3    | 57.67  | 78.00  | 0.56 |          |
| Xie et al. 2018     | <i>Quercus variabilis</i>     | 0.026    | 1.09   | 94.33  | 7.67   | 0.61 |          |
| Xie et al. 2018     | <i>Populus tomentosa</i>      | 0.02     | 1.29   | 72.33  | 28.00  | 0.45 |          |
| Xie et al. 2018     | <i>Platycladus orientalis</i> | 0.014    | 1.2    | 14.67  | 99.67  | 0.54 |          |
| Xie et al. 2018     | <i>Pinus bungeana</i>         | 0.013    | 1.2    | 16.67  | 294.33 | 0.43 |          |
| Zeng et al. 2021    | <i>Toona sinensis</i>         | 0.05667  | 1.213  |        |        | 0.45 |          |
| Zeng et al. 2021    | <i>Populus adenopoda</i>      | 0.075715 | 1.865  |        |        | 0.42 |          |
| Zeng et al. 2022    | <i>Pyrus pyrifolia</i>        | 0.066745 | 1.66   |        | 191.00 |      | -55.6    |
| Zhang et al. 2017   | <i>Bambusa chungii</i>        | 0.01776  | 1.2    |        |        |      | -36      |
| This study          | <i>Paliurus ramosissimus</i>  | 0.0047   | 0.5882 | 30.85  | 34.47  | 0.75 | 86.80589 |
| This study          | <i>Pyracantha fortuneana</i>  | 0.0065   | 1.4802 | 14.20  | 193.26 | 0.71 | 113.5268 |
| This study          | <i>Triadica sebifera</i>      | 0.0076   | 1.6654 | 42.51  | 31.92  | 0.48 | 51.63288 |
| This study          | <i>Xylosma congesta</i>       | 0.0141   | 1.5697 | 12.93  | 244.20 | 0.62 | 20.1423  |
| This study          | <i>Sageretia thea</i>         | 0.0198   | 1.8844 | 24.09  | 41.49  | 0.67 | -21.151  |
| This study          | <i>Celtis sinensis</i>        | 0.03     | 1.9821 | 39.70  | 38.61  | 0.72 | -18.6893 |
| This study          | <i>Phanera championii</i>     | 0.0509   | 3.0391 | 56.27  | 13.03  | 0.47 | -76.9122 |

## References

1. Alla, F.; Jdaini, K.; M'hamdi, H.; Mechchate, H.; AlZain, M.N.; Alzamel, N.M.; Noman, O.; Mimouni, J.; Elhoumaizi, M.A. Calibration of Thermal Dissipation Probes for Date Palm (*Phoenix dactylifera* L.). *Horticulturae* **2022**, *8*, 107. <https://doi.org/10.3390/horticulturae8020107>
2. Bush, S.E.; Hultine, K.R.; Sperry, J.S.; Ehleringer, J.R. Calibration of thermal dissipation sap flow probes for ring-and diffuse-porous trees. *Tree physiol.* **2010**, *30*, 1545-1554. <https://doi.org/10.1093/treephys/tpq096>
3. Cabibel, B.; Do, F.; Horoyan, J. Mesures thermiques des flux de sève dans les troncs et les racines et fonctionnement hydrique des arbres. I. Analyse théorique des erreurs sur la mesure des flux et validation des mesures en présence de gradients thermiques extérieurs. *Agronomie* **1991**, *11*, 669-678.
4. Fuchs, S.; Leuschner, C.; Link, R.; Coners, H.; Schuldt, B. Calibration and comparison of thermal dissipation, heat ratio and heat field deformation sap flow probes for diffuse-porous trees. *Agr. Forest. Meteorol.* **2017**, *244*, 151-161. <https://doi.org/10.1016/j.agrformet.2017.04.003>
5. Fujime, N.; Kumagai, T.; Egusa, T.; Momiyama, H.; Uchiyama, Y. Importance of calibration in determining forest stand transpiration using the thermal dissipation method. *Agr. Forest. Meteorol.* **2021**, *301*, 108356. <https://doi.org/10.1016/j.agrformet.2021.108356>
6. Granier, A. Une nouvelle méthode pour la mesure du flux de sève brute dans le tronc des arbres. *Annales des Sciences Forestières* **1985**, *42*, 193-200.
7. Gutiérrez, M. V.; Santiago, L. S. A comparison of sap flow measurements and potometry in two tropical lowland tree species with contrasting wood properties. *Revista de biología tropical* **2006**, *54*, 73-81.
8. Hadiwijaya, B.; Pepin, S.; Isabelle, P.-E.; Nadeau, D.F. The Dynamics of Transpiration to Evapotranspiration Ratio under Wet and Dry Canopy Conditions in a Humid Boreal Forest. *Forests* **2020**, *11*, 237. <https://doi.org/10.3390/f11020237>
9. Herbst, M.; Roberts, J. M.; Rosier, P. T. W.; Gowing, D. J.. Seasonal and interannual variability of canopy transpiration of a hedgerow in southern England. *Tree physi.* **2007**, *27*, 321-333. <https://doi.org/10.1093/treephys/27.3.321>
10. Hu, M.; Ma, C.; Zhang, J.; Ma, Y.; Li, C.; Xiong, W. Calibration of Thermal Dissipation Probes for Xylem Sap Flow in the Wood of a Diffuse-Porous and a Conifer Species under Cyclic Heating. *Forests* **2022**, *13*, 1964. <https://doi.org/10.3390/f13111964>
11. Hubbard, R. M.; Stape, J.; Ryan, M. G.; Almeida, A. C.; Rojas, J. Effects of irrigation on water use and water use efficiency in two fast growing *Eucalyptus* plantations. *Forest Ecol. Manag.* **2010**, *259*, 1714-1721. <https://doi.org/10.1016/j.foreco.2009.10.028>
12. Hultine, K.R.; Nagler, P.L.; Morino, K.; Bus, S.E.; Burtch, K.G.; Dennison, P.E.; Glenn, E.P.; Ehleringer, J.R. Sap flux-scaled transpiration by tamarisk (*Tamarix spp.*) before, during and after episodic defoliation by the saltcedar leaf beetle (*Diorhabda carinulata*). *Agr. Forest. Meteorol.* **2010**, *150*, 1467-1475. <https://doi.org/10.1016/j.agrformet.2010.07.009>
13. Iida, S.; Takeuchi, S.; Shinozaki, K.; Araki, M. Calibration of sap flow techniques using the root-ball weighing method in Japanese cedar trees. *Trees* **2022**, *36*,

1747-1759. <https://doi.org/10.1007/s00468-022-02325-w>

14. Liu Y, Zhang H, Ma C, Liu, B.; Ding, C. Verification of sap flow characteristics and measurement errors of *Populus tomentosa* Carr. and *Salix babylonica* L. based on the liquid level equilibrium method. *Front. Plant Sci.* **2022**, 13, 946804. <https://doi.org/10.3389/fpls.2022.946804>
15. Lu P. Whole-plant water use of some tropical and subtropical tree crops and its application in irrigation management. *Acta Horticulturae* **2002**, 575, 781–789. <https://doi.org/10.17660/ActaHortic.2002.575.92>
16. Ma, C.; Luo, Y.; Shao, M.; Sun, L.; Jia, X. Environmental controls on sap flow in black locust forest in Loess Plateau, China. *Sci. Rep-Uk.* **2017**, 7, 1-12. <https://doi.org/10.1038/s41598-017-13532-8>
17. Niu, F.; Röhl, A.; Hardanto, A.; Mejjide, A.; Köhler, M.; Hendrayanto.; Hölscher, D. Oil palm water use: calibration of a sap flux method and a field measurement scheme. *Tree Physiol.* **2015**, 35, 563-573. <https://doi.org/10.1093/treephys/tpv013>
18. Ouyang, S.; Xiao, K.; Zhao, Z.; Xiang, W.; Xu, C.; Lei, P.; Deng, X.; Li, J. Stand Transpiration Estimates from Recalibrated Parameters for the Granier Equation in a Chinese Fir (*Cunninghamia lanceolata*) Plantation in Southern China. *Forests* **2018**, 9, 162. <https://doi.org/10.3390/f9040162>
19. Pasqualotto, G.; Carraro, V.; Menardi, R.; Anfodillo, T. Calibration of Granier-Type (TDP) Sap Flow Probes by a High Precision Electronic Potometer. *Sensors* **2019**, 19, 2419. <https://doi.org/10.3390/s19102419>
20. Paudel, I.; Kanety, T.; Cohen, S. Inactive xylem can explain differences in calibration factors for thermal dissipation probe sap flow measurements. *Tree Physiol.* **2013**, 33, 986-1001. <https://doi.org/10.1093/treephys/tpt070>
21. Peters, R.L.; Fonti, P.; Frank, D.; Poyatos, R.; Pappas, C.; Kahmen, A.; Carraro, V.; Prendin, A.L.; Schneider, L.; Baltzer, J.L.; et al. Quantification of uncertainties in conifer sap flow measured with the thermal dissipation method. *New Phytol.* **2018**, 219, 1283–1299. <https://doi.org/10.1111/nph.15241>
22. Renninger, H. J.; Phillips, N.; Salvucci, G. D. Wet-vs. dry-season transpiration in an Amazonian rain forest palm *Iriarte deltoidea*. *Biotropica* **2010**, 42, 470-478. <https://doi.org/10.1111/j.1744-7429.2009.00612.x>
23. Rubilar, R. A.; Hubbard, R. M.; Yañez, M. A.; Medina, A. M.; Valenzuela, H. E. Quantifying differences in thermal dissipation probe calibrations for *Eucalyptus globulus* species and *E. nitens* × *globulus* hybrid. *Trees* **2017**, 31, 1263-1270.
24. Schmidt-Walter, P.; Richter, F.; Herbst, M.; Schuldt, B.; Lamersdorf, N. P. Transpiration and water use strategies of a young and a full-grown short rotation coppice differing in canopy cover and leaf area. *Agr. Forest Meteorol.* **2014**, 195, 165-178. <http://dx.doi.org/10.1016/j.agrformet.2014.05.006>
25. Sérvulo, A. C. O.; Vellame, L. M.; Casaroli, D.; Júnior, J. A.; Souza, P. H. African Mahogany transpiration with Granier method and water table lysimeter. *Revista Brasileira de Engenharia Agrícola e Ambiental* **2017**, 21, 322-326. <https://doi.org/10.1590/1807-1929/agriambi.v21n5p322-326>
26. Shinohara, Y.; Iida, S.; Oda, T.; Katayama, A.; Tsuruta, K.; Sato, T.; Tanaka, N.; Su, M.-P.; Laplace, S.; Kijidani, Y.; et al. Are calibrations of sap flow measurements

based on thermal dissipation needed for each sample in Japanese cedar and cypress trees? *Trees* **2022**, *36*, 1219-1229. <https://doi.org/10.1007/s00468-022-02283-3>

27. Siddiq, Z.; Tomlinson, K.W.; Zhu, S.-D.; Cao, K.-F. Does fluctuation of meteorological conditions across years influence stand transpiration of *Tectona grandis* plantation?. *Ecohydrology* **2019**, *12*, e2116. <https://doi.org/10.1002/eco.2116>
28. Song, L.; Zhu, J.; Zheng, X.; Wan, K.; Zhang, J.; Hao, G.; Wang, G.; Liu, J. Comparison of canopy transpiration between *Pinus sylvestris* var. *mongolica* and *Pinus tabuliformis* plantations in a semiarid sandy region of Northeast China. *Agr. Forest. Meteorol.* **2022**, *314*, 108784. <https://doi.org/10.1016/j.agrformet.2021.108784>
29. Steppe, K.; De Pauw, D.J.; Doody, T.M.; Teskey, R.O. A comparison of sap flux density using thermal dissipation, heat pulse velocity and heat field deformation methods. *Agric. For. Meteorol.* **2010**, *150*, 1046–1056. <https://doi.org/10.1016/j.agrformet.2010.04.004>
30. Sun, H.; Aubrey, D.P.; Teskey, R.O. A simple calibration improved the accuracy of the thermal dissipation technique for sap flow measurements in juvenile trees of six species. *Trees* **2012**, *26*, 631-640. <https://doi.org/10.1007/s00468-011-0631-1>
31. Vellame, L. M.; Coelho Filho, M. A.; Paz, V. P. S. Transpiração em mangueira pelo método Granier. *Revista Brasileira de Engenharia Agrícola e Ambiental* **2009**, *13*, 516-523. <https://doi.org/10.1590/S1415-43662009000500002>
32. Zeng, X.; Xu, X.; Zhong, F.; Xu, T.; Luo, W.; Yi, R.; Li, X. Use of gravimetric measurements to calibrate thermal dissipation probes with stem segments. *Hydrol. Process.* **2022**, *36*, e14478. <https://doi.org/10.1002/hyp.14478>
33. Zhang, Z.; Zhou, J.; Zhao, P.; Zhao, X.; Zhu, L.; Ouyang, L.; Ni, G. Validation and in situ application of a modified thermal dissipation probe for evaluating standing water use of a clumped bamboo: *Bambusa chungii*. *Agr. Forest. Meteorol.* **2017**, *239*, 15-23. <https://doi.org/10.1016/j.agrformet.2017.02.023>
